# Supplementary material
Source: PubMed Central journal article supplement (PMC4026948)
Supplement: NIHMS574865-supplement-Supplement.pdf [file NIHMS574865-supplement-Supplement.pdf]

## Supplementary Information

### Supplementary Table S1. Parameters of the mathematical model

The values of the parameters of the model were either taken from the literature (References are listed) or optimized to obtain the best possible fit to the experimental data.

| Notation | Parameter       | Value  | Units    | Description                                               | Refs.  |
|----------|-----------------|--------|----------|-----------------------------------------------------------|--------|
| 1        | $k_{ATG\ int}$  | 0.25   | 1/min    | Rate of production of ATG                                 | [1]    |
| 2        | $k_{MADG\ int}$ | 90     | 1/min    | Rate of production of MADG                                | [1]    |
| 3        | $k_{DMAG}$      | 0.0122 | 1/min    | Rate of production of DMAG                                | [1]    |
| 4        | $k_{oxd}$       | 33.254 | 1/min    | Rate of oxidation of DMA <sup>III</sup>                   | [1]    |
| 5        | $k_{oxm}$       | 0.2375 | 1/min    | Rate of oxidation of MMA <sup>III</sup>                   | [1]    |
| 6        | $k_{iAs\ int}$  | 320    | 1/min    | Rate of production of iAs <sup>III</sup>                  | [1]    |
| 7        | $k_{MMA\ int}$  | 1200   | 1/min    | Rate of production of MMA <sup>III</sup>                  | [1]    |
| 8        | $n_3$           | 8      | -        | Hill coefficient of inhibition of MMA <sup>III</sup>      | [1]    |
| 9        | $Kd_3$          | 12.94  | $\mu$ M  | Dissociation constant of inhibition of MMA <sup>III</sup> | [1]    |
| 10       | $f_{GSHm}$      | 0.992  | -        | Coefficient of inhibition of MADG hydrolysis              | [1]    |
| 11       | $k_{dec\ ROS}$  | 99.55  | 1/min    | Rate of ROS production decrease                           | fitted |
| 12       | $k_{DMA\ int}$  | 0.8472 | 1/min    | Rate of production of DMA <sup>III</sup>                  | [1]    |
| 13       | $f_{GSHd}$      | 0.9988 | -        | Coefficient of inhibition of DMAG hydrolysis              | [1]    |
| 14       | $V_{max_{t2}}$  | 1.237  | pmol/min | Maximal rate of MADG efflux                               | [1]    |
| 15       | $Km_{t2}$       | 19.47  | $\mu$ M  | Half saturation constant of MADG efflux                   | [1]    |
| 16       | $k_{in\ ROS}$   | 6.26   | 1/min    | Rate of ROS production increase                           | fitted |
| 17       | $k_{ss}$        | 4.26   | 1/min    | Steady state rate of efflux of iAs <sup>III</sup>         | [1]    |
| 18       | $\tau_e$        | 10     | min      | Time constant of AQP9 inactivation                        | [1]    |
| 19       | $k_0$           | 4.2    | 1/min    | Initial rate of efflux of iAs <sup>III</sup>              | [1]    |
| 20       | $k_{inf}$       | 1.613  | 1/min    | Influx of iAs <sup>III</sup>                              | [1]    |
| 21       | $k_{MMA\ ext}$  | 0.0006 | 1/min    | Rate of efflux of MMA                                     | [1]    |
| 22       | $f_m$           | 0.2    | -        | Coefficient of efflux of MMA                              | [1]    |
| 23       | $V_{max_{t1}}$  | 0.35   | pmol/min | Maximal rate of ATG efflux                                | [1]    |
| 24       | $Km_{t1}$       | 2.3    | $\mu$ M  | Half saturation constant of ATG efflux                    | [1]    |
| 25       | $k_{DMA\ ext}$  | 0.002  | 1/min    | Rate of efflux of DMA                                     | [1]    |
| 26       | $f_d$           | 3      | -        | Coefficient of efflux of DMA                              | [1]    |
| 27       | $V_{max_m}$     | 50     | pmol/min | Maximal rate of ATG methylation                           | [1]    |
| 28       | $Km_m$          | 9.32   | $\mu$ M  | Half saturation constant of ATG methylation               | [1]    |
| 29       | $n_1$           | 1.22   | -        | Hill coefficient of ATG methylation                       | [1]    |
| 30       | $Kd_1$          | 0.315  | $\mu$ M  | Dissociation constant of ATG methylation                  | [1]    |
| 31       | $K_{im}$        | 1.53   | $\mu$ M  | Inhibition constant of ATG methylation                    | [1]    |
| 32       | $K_{id}$        | 1      | $\mu$ M  | Inhibition constant of MADG methylation                   | [1]    |
| 33       | $V_{max_d}$     | 8      | pmol/min | Maximal rate of MADG methylation                          | [1]    |
| 34       | $Km_d$          | 0.034  | $\mu$ M  | Half saturation constant of MADG methylation              | [1]    |
| 35       | $n_2$           | 1.83   | -        | Hill coefficient of MADG methylation                      | [1]    |
| 36       | $Kd_2$          | 2.33   | $\mu$ M  | Dissociation constant of MADG methylation                 | [1]    |
| 37       | $ka_{in}$       | 1.64   | 1/min    | Rate of AS3MT efficiency increase                         | [1]    |
| 38       | $f_A$           | 50     | -        | Coefficient of MADG methylation inactivation              | [1]    |
| 39       | $k_{TR}$        | 0.99   | 1/min    | Rate of TR signaling                                      | [1]    |
| 40       | $k_{TRinact}$   | 987.13 | 1/min    | Rate of TR inactivation                                   | [1]    |
| 41       | $TR_C$          | 15     | -        | Constant of TR inactivation                               | [1]    |
| 42       | $N$             | 1.75   | -        | Hill coefficient of TR inactivation                       | [1]    |
| 43       | $TR_0$          | 9.27   | -        | Steady state value of TR activity                         | [1]    |

| Notation | Parameter           | Value  | Units                           | Description                                          | Refs.   |
|----------|---------------------|--------|---------------------------------|------------------------------------------------------|---------|
| 44       | $k_{\text{syn NF}}$ | 994.53 | $\mu\text{M}^{-1} / \text{min}$ | Rate of increase of Nrf2 activity                    | fitted  |
| 45       | $k_{\text{deg NF}}$ | 0.38   | 1/min                           | Rate of decrease of Nrf2 activity                    | fitted  |
| 46       | $k_{\text{mGC}}$    | 0.06   | 1/min                           | Rate of transcriptional activity of GCLC             | fitted  |
| 47       | $k_{\text{synGC}}$  | 1.9    | 1/min                           | Rate of translational activity of GCLC               | fitted  |
| 48       | $k_{\text{mMRP}}$   | 5.78   | 1/min                           | Rate of transcriptional activity of MRP              | fitted  |
| 49       | $k_{\text{MRP}}$    | 99.96  | 1/min                           | Rate of translational activity of MRP                | fitted  |
| 50       | $k_{\text{synG}}$   | 98.43  | -                               | Coefficient of transcriptional activity of GCLC      | fitted  |
| 51       | $k_{\text{synP}}$   | 993.2  | -                               | Coefficient of transcriptional activity of MRP       | fitted  |
| 52       | $K_{d4}$            | 1000   | $\mu\text{M}$                   | Dissociation constant of GCLC upregulation           | fitted  |
| 53       | $n_4$               | 1.3    | -                               | Hill coefficient of GCLC upregulation                | fitted  |
| 54       | $k_{\text{DNA}}$    | 69,994 | 1/min                           | Rate of production of DNA lesions                    | fitted  |
| 55       | $k_1$               | 0.45   | 1/min                           | Rate of Ogg1 glycosylase                             | [2,3,4] |
| 56       | $k_2$               | 184.8  | 1/min                           | Rate of Ape1 AP endonuclease                         | [2,3,4] |
| 57       | $k_3$               | 37.5   | 1/min                           | Rate of Pol $\beta$ gap-filling                      | [2,3,4] |
| 58       | $k_4$               | 4.5    | 1/min                           | Rate of Pol $\beta$ dRp lyase                        | [2,3,4] |
| 59       | $k_5$               | 2.4    | 1/min                           | Rate of Lig1 ligation                                | [2,3,4] |
| 60       | $k_6$               | 0.13   | 1/min                           | Rate of Pol $\delta$ gap-filling                     | [2,3,4] |
| 61       | $k_7$               | 46.8   | 1/min                           | Rate of Fen1 5'-endo                                 | [2,3,4] |
| 62       | $e_1$               | 0.048  | $\mu\text{M}$                   | Concentration of Ogg1                                | [2,3,4] |
| 63       | $e_2$               | 0.119  | $\mu\text{M}$                   | Concentration of Ape1                                | [2,3,4] |
| 64       | $e_3$               | 0.019  | $\mu\text{M}$                   | Concentration of Pol $\beta$                         | [2,3,4] |
| 65       | $e_4$               | 0.019  | $\mu\text{M}$                   | Concentration of Pol $\delta$                        | [2,3,4] |
| 66       | $e_5$               | 0.019  | $\mu\text{M}$                   | Concentration of Fen1                                | [2,3,4] |
| 67       | $e_6$               | 0.127  | $\mu\text{M}$                   | Concentration of Lig1                                | [2,3,4] |
| 68       | $K_1$               | 0.0089 | $\mu\text{M}$                   | Half saturation constant of Ogg1 glycosylase         | [2,3,4] |
| 69       | $K_2$               | 0.0325 | $\mu\text{M}$                   | Half saturation constant of Ape1 AP endonuclease     | [2,3,4] |
| 70       | $K_3$               | 0.3    | $\mu\text{M}$                   | Half saturation constant of Pol $\beta$ gap-filling  | [2,3,4] |
| 71       | $K_4$               | 0.5    | $\mu\text{M}$                   | Half saturation constant of Pol $\beta$ dRp lyase    | [2,3,4] |
| 72       | $K_5$               | 0.1    | $\mu\text{M}$                   | Half saturation constant of Lig1 ligation            | [2,3,4] |
| 73       | $K_6$               | 0.067  | $\mu\text{M}$                   | Half saturation constant of Pol $\delta$ gap-filling | [2,3,4] |
| 74       | $K_7$               | 0.039  | $\mu\text{M}$                   | Half saturation constant of Fen1 5'-endo             | [2,3,4] |

## Supplementary Figures. Sensitivity analysis and robustness to parameter perturbations

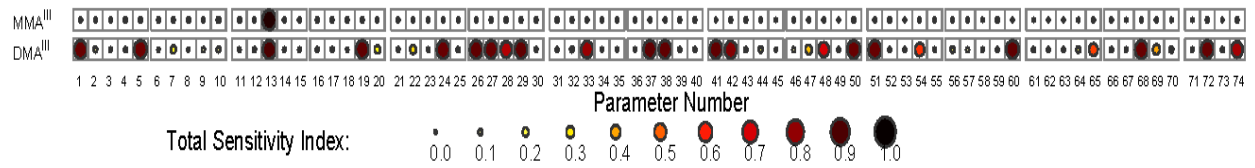

**Figure S1. Sensitivity analysis of intracellular levels of MMA<sup>III</sup> and DMA<sup>III</sup>.**

Total Sensitivity Indices (TSI) of the cellular-level TK/TD model parameters for exposure to iAs<sup>III</sup>. The parameters are listed in Table S1.

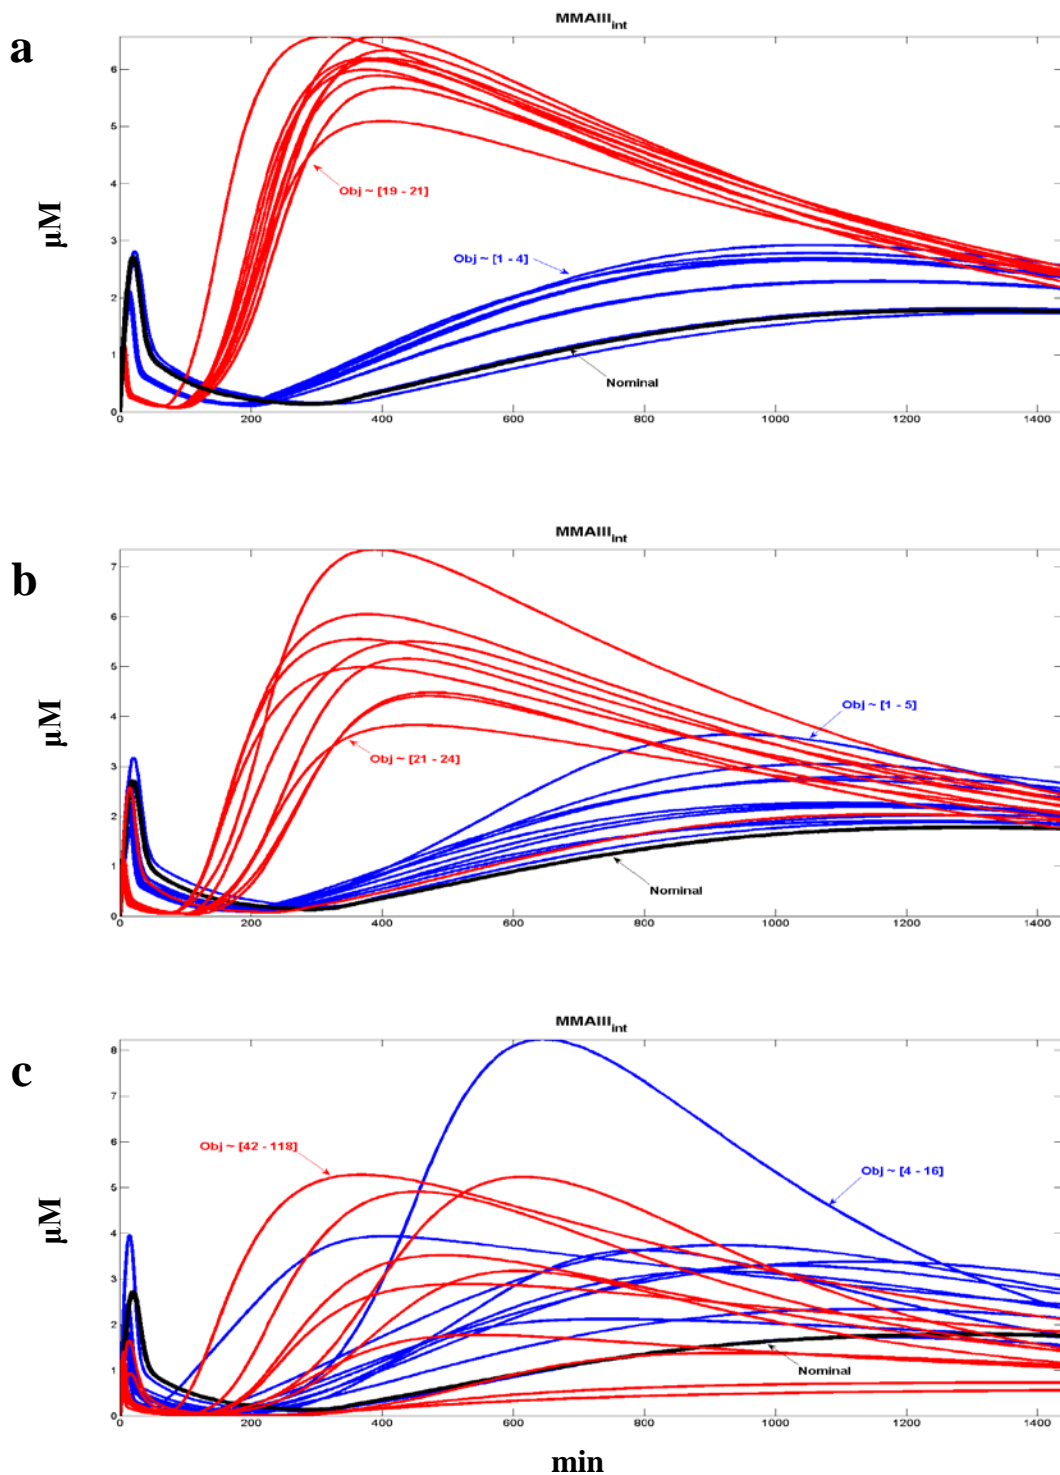

**Figure S2. Robustness of time course profiles of intracellular MMA<sup>III</sup> ( $\mu\text{M}$ ) in hepatocytes due to perturbations in the parameter set.**

Black line corresponds to the nominal parameter set. Blue lines correspond to simulations with normalized objective cost function that spans up to 16-fold increase. The red lines correspond to

simulations with normalized cost function which is over 19-fold elevated. a) 5%, b) 10%, c) 20%, standard deviation of the nominal parameter value.

### Supplementary Text. Mathematical formulation of the TK model of arsenite ( $iAs^{III}$ ) in human hepatocytes [1]

$$\begin{aligned} \frac{d(iAs^{III})_{int}}{dt} = & k_{inf} \times (iAs^{III})_{ext} - AQP9 \times (iAs^{III})_{int} \\ & - k_{ATG_{int}} \times (iAs^{III})_{int} + k_{iAs^{III}_{int}} \times (ATG)_{int} \end{aligned} \quad (A.1a)$$

$$AQP9 = [k_0 + (k_{SS} - k_0) \times (1 - e^{-\frac{t}{\tau_e}})] \quad (A.1b)$$

$$\frac{d(iAs^{III})_{ext}}{dt} = AQP9 \times (iAs^{III})_{int} - k_{inf} \times (iAs^{III})_{ext} \quad (A.2)$$

$$\frac{dTR}{dt} = k_{TR} \times (TR_0 - TR) - \frac{S}{TR_C} \times k_{TR_{inact}} \times H_{TR} \quad (A.3a)$$

$$H_{TR} = \frac{[MMA^{III}]^N}{(IC_{TR})^N + [MMA^{III}]^N} \quad (A.3b)$$

$$\frac{dGSH}{dt} = k_{g_{in}} \times \frac{1}{TR} - k_{g_{deg}} \times GSH \quad (A.4a)$$

$$k_{g_{deg}} = \frac{k_{g_{in}}}{TR_0} \quad (A.4b)$$

$$\frac{dMRP}{dt} = k_{m_{in}} \times \frac{1}{TR} - k_{m_{deg}} \times MRP \quad (A.5a)$$

$$k_{m_{deg}} = \frac{k_{m_{in}}}{TR_0} \quad (A.5b)$$

$$\frac{dAS3MT}{dt} = k_{a_{in}} \times TR - k_{a_{dec}} \times AS3MT \quad (A.6a)$$

$$k_{a_{dec}} = k_{a_{in}} \times TR_0 \quad (A.6b)$$

$$MADG_{ui} = MT_1 \times \frac{[ATG]_{int}}{1 + \frac{[ATG]_{int}}{K_{m_m}} \times (1 + \frac{[ATG]_{int}}{K_{im}})} \quad (A.7a)$$

$$MT_1 = \frac{([ATG]_{int} + [ATG]_{ext})^{n_1}}{(K_{d_1})^{n_1} + ([ATG]_{int} + [ATG]_{ext})^{n_1}} \times \frac{V_{max_m}}{K_{m_m}} \quad (A.7b)$$

$$DMAG_{ui} = MT_2 \times \frac{[MADG]_{int}}{1 + \frac{[MADG]_{int}}{K_{m_d}} \times (1 + \frac{[ATG]_{int}}{K_{id}})} \quad (A.8a)$$

$$MT_2 = \frac{AS3MT}{f_A \times \tanh(S) + 1} \times \frac{([ATG]_{int} + [ATG]_{ext})^{n_2}}{(K_{d_2})^{n_2} + ([ATG]_{int} + [ATG]_{ext})^{n_2}} \times \frac{V_{max_d}}{K_{m_d}} \quad (A.8b)$$

$$HD_m = [1 - f_{GSH_m} \times \tanh(S)] \times (1 - H_{GSH} + \tanh(S) \times H_{GSH}) \times GS-P_m \times (MADG)_{int} \quad (A.9a)$$

$$GS-P_m = \frac{k_{MMA_{int}^{III}}}{GSH} \quad (A.9b)$$

$$H_{GSH} = \frac{([ATG]_{int} + [ATG]_{ext})^{n_3}}{(K_{d_3})^{n_3} + ([ATG]_{int} + [ATG]_{ext})^{n_3}} \quad (A.9c)$$

$$HD_d = [1 - f_{GSH_d} \times \tanh(S)] \times GS-P_d \times (DMAG)_{int} \quad (A.10a)$$

$$GS-P_d = \frac{k_{DMA_{int}^{III}}}{GSH} \quad (A.10b)$$

$$\frac{d(\text{ATG})_{\text{ext}}}{dt} = \text{MRP}_a \times \frac{[\text{ATG}]_{\text{int}}}{1 + \frac{[\text{ATG}]_{\text{int}}}{K_{m_{t_1}}}} \quad (\text{A.11a})$$

$$\text{MRP}_a = \frac{V_{\max_{t_1}}}{K_{m_{t_1}}} \quad (\text{A.11b})$$

$$\frac{d(\text{MADG})_{\text{ext}}}{dt} = \text{MRP}_m \times \frac{[\text{MADG}]_{\text{int}}}{1 + \frac{[\text{MADG}]_{\text{int}}}{K_{m_{t_2}}}} \quad (\text{A.12a})$$

$$\text{MRP}_m = \text{MRP} \times \frac{V_{\max_{t_2}}}{K_{m_{t_2}}} \quad (\text{A.12b})$$

$$\frac{d(\text{MMA}^{\text{V}})_{\text{ext}}}{dt} = [(f_m - 1) \times \tanh(S) + 1] \times k_{\text{MMA}_{\text{ext}}} \times (\text{MMA}^{\text{V}})_{\text{int}} \quad (\text{A.13})$$

$$\frac{d(\text{MMA}^{\text{III}})_{\text{ext}}}{dt} = [(f_m - 1) \times \tanh(S) + 1] \times k_{\text{MMA}_{\text{ext}}} \times (\text{MMA}^{\text{III}})_{\text{int}} \quad (\text{A.14})$$

$$\frac{d(\text{DMA}^{\text{V}})_{\text{ext}}}{dt} = [(f_d - 1) \times \tanh(S) + 1] \times k_{\text{DMA}_{\text{ext}}} \times (\text{DMA}^{\text{V}})_{\text{int}} \quad (\text{A.15})$$

$$\frac{d(\text{DMA}^{\text{III}})_{\text{ext}}}{dt} = [(f_d - 1) \times \tanh(S) + 1] \times k_{\text{DMA}_{\text{ext}}} \times (\text{DMA}^{\text{III}})_{\text{int}} \quad (\text{A.16})$$

$$\begin{aligned} \frac{d(\text{ATG})_{\text{int}}}{dt} &= k_{\text{ATG}_{\text{int}}} \times (\text{iAs}^{\text{III}})_{\text{int}} - k_{\text{iAs}^{\text{III}}_{\text{int}}} \times (\text{ATG})_{\text{int}} \\ &\quad - \text{MADG}_{\text{ui}} - \frac{d(\text{ATG})_{\text{ext}}}{dt} \end{aligned} \quad (\text{A.17})$$

$$\begin{aligned} \frac{d(\text{MADG})_{\text{int}}}{dt} &= \text{MADG}_{\text{ui}} + k_{\text{MADG}_{\text{int}}} \times (\text{MMA}^{\text{III}})_{\text{int}} \\ &\quad - \text{DMAG}_{\text{ui}} - \text{HD}_m - \frac{d(\text{MADG})_{\text{ext}}}{dt} \end{aligned} \quad (\text{A.18})$$

$$\frac{d(\text{MMA}^{\text{III}})_{\text{int}}}{dt} = \text{HD}_m - (k_{\text{MADG}_{\text{int}}} + k_{\text{oxm}}) \times (\text{MMA}^{\text{III}})_{\text{int}} - \frac{d(\text{MMA}^{\text{III}})_{\text{ext}}}{dt} \quad (\text{A.19})$$

$$\frac{d(\text{MMA}^{\text{V}})_{\text{int}}}{dt} = k_{\text{oxm}} \times (\text{MMA}^{\text{III}})_{\text{int}} - \frac{d(\text{MMA}^{\text{V}})_{\text{ext}}}{dt} \quad (\text{A.20})$$

$$\frac{d(\text{DMAG})}{dt} = \text{DMAG}_{\text{ui}} + k_{\text{DMAG}} \times (\text{DMA}^{\text{III}})_{\text{int}} - \text{HD}_d \quad (\text{A.21})$$

$$\frac{d(\text{DMA}^{\text{III}})_{\text{int}}}{dt} = \text{HD}_d - (k_{\text{DMAG}} + k_{\text{oxd}}) \times (\text{DMA}^{\text{III}})_{\text{int}} - \frac{d(\text{DMA}^{\text{III}})_{\text{ext}}}{dt} \quad (\text{A.22})$$

$$\frac{d(\text{DMA}^{\text{V}})_{\text{int}}}{dt} = k_{\text{oxd}} \times (\text{DMA}^{\text{III}})_{\text{int}} - \frac{d(\text{DMA}^{\text{V}})_{\text{ext}}}{dt} \quad (\text{A.23})$$

## References

1. Stamatelos SK, Brinkerhoff CJ, Isukapalli SS, Georgopoulos PG (2011) Mathematical model of uptake and metabolism of arsenicals in human hepatocytes – Incorporation of cellular antioxidant response and threshold-dependent behavior. *BMC Systems Biology* 5: 16.
2. Sokhansanj BA, Rodrigue GR, Fitch JP, Wilson DM (2002) A quantitative model of human DNA base excision repair. I. mechanistic insights. *Nucleic Acids Research* 30: 1817-1825.
3. Sokhansanj BA, Wilson DM (2004) Oxidative DNA damage background estimated by a system model of base excision repair. *Free Radical Biology and Medicine* 37: 422-427.
4. Sokhansanj BA, Wilson DM (2006) Estimating the effect of human base excision repair protein variants on the repair of oxidative DNA base damage. *Cancer Epidemiology Biomarkers & Prevention* 15: 1000-1008.
